# Supplementary material
Source: PubMed Central journal article supplement (PMC6851658)

**Figure S1:** Correlations between mRNA expressions and protein expressions (Spearman's correlation coefficient,  $r_s$ )

Apical

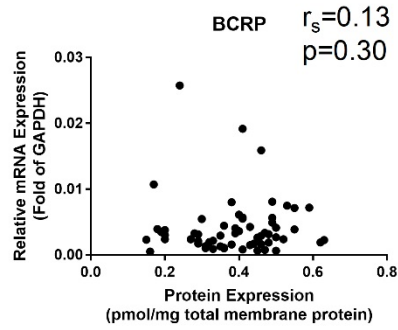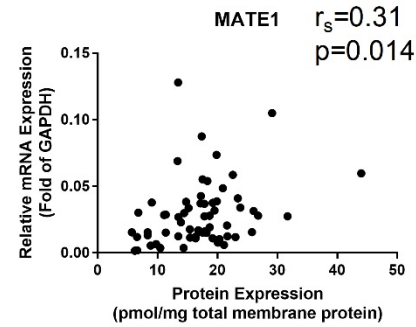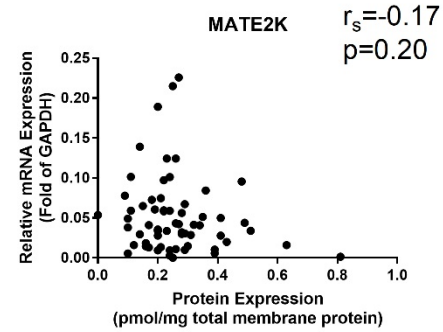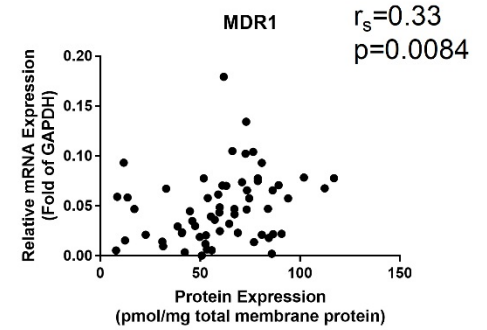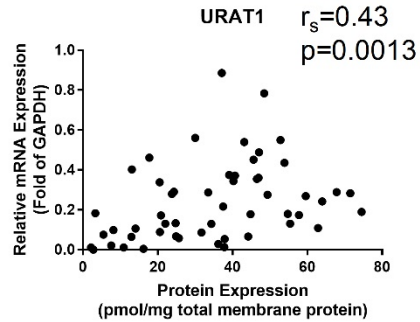

Basolateral

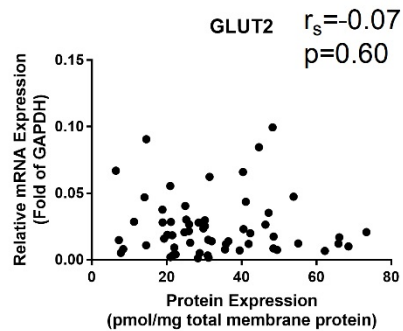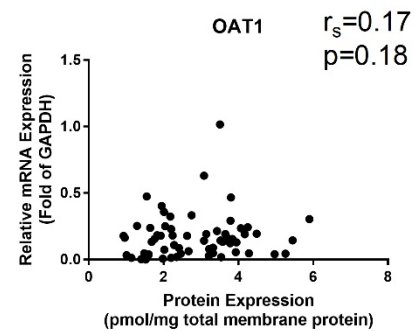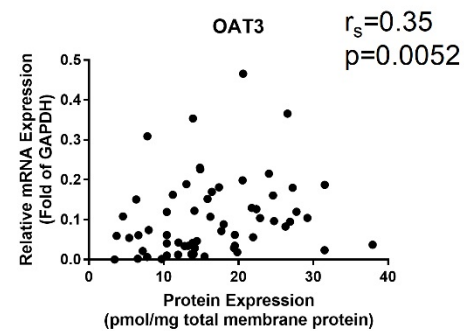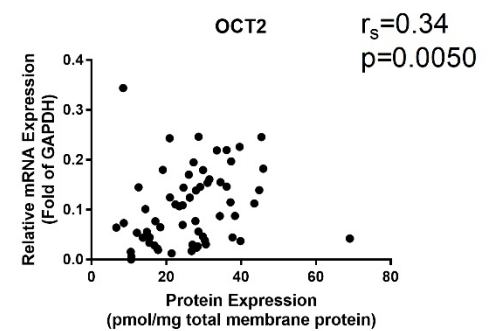

Supplement: CPT-106-1083-s001.pdf [file CPT-106-1083-s001.pdf]
