# Supplementary material
Source: PubMed Central journal article supplement (PMC6851658)
Supplement: CPT-106-1083-s002.pdf [file CPT-106-1083-s002.pdf]

**Table S1:** Mann-Whitney U test to examine the differences in mRNA and protein expression between female and male

|                | <u>mRNA Expression Analysis</u> |                             |                                    | <u>Quantitative Proteomics</u> |                    |                                    |
|----------------|---------------------------------|-----------------------------|------------------------------------|--------------------------------|--------------------|------------------------------------|
|                | <u>Median (range)</u>           |                             | <u>Mann-Whitney U test p-value</u> | <u>Median (range)</u>          |                    | <u>Mann-Whitney U test p-value</u> |
|                | <u>Female</u>                   | <u>Male</u>                 |                                    | <u>Female</u>                  | <u>Male</u>        |                                    |
| <b>BCRP</b>    | 0.00304<br>(0.00012-0.12)       | 0.0031 (0.00014-0.026)      | 0.71                               | 0.41 (0.18-0.62)               | 0.37 (0.15-0.63)   | 0.52                               |
| <b>MATE1</b>   | 0.028 (0.0012-0.56)             | 0.032 (0-0.51)              | 0.44                               | 17.24 (6.211-29.13)            | 16.12 (5.72-31.72) | 0.4                                |
| <b>MATE2-K</b> | 0.032 (0.0032-0.39)             | 0.034 (0.0022-0.51)         | 0.89                               | 0.25 (0.14-0.81)               | 0.24 (0.00-0.31)   | 0.27                               |
| <b>MRP2</b>    | 0.013 (6.32E-5 - 0.083)         | 0.018 (0.00089 - 0.18)      | 0.32                               | NA                             | NA                 | NA                                 |
| <b>MRP4</b>    | 0.019 (0.0042-0.031)            | 0.017 (0.0014-0.041)        | 0.91                               | NA                             | NA                 | NA                                 |
| <b>MDR1</b>    | 0.031 (0.00032-0.37)            | 0.034 (0.0016-0.23)         | 0.52                               | 66.12 (11.68-102)              | 54.6 (7.84-112.4)  | 0.2                                |
| <b>URAT1</b>   | 0.14 (0.0082-0.7204)            | 0.1582 (5.65E-5 - 1.35)     | 0.89                               | 39.1 (2.17-76.05)              | 35.26 (2.79-74.50) | 0.54                               |
| <b>GLUT2</b>   | 0.017 (0.0012-0.50)             | 0.024 (0.0012-0.099)        | 0.35                               | 32.01 (7.21-73.94)             | 26.12 (6.41-68.55) | 0.39                               |
| <b>OAT1</b>    | 0.076 (2.3E-5 - 0.36)           | 0.11 (0.00037-0.67)         | 0.18                               | 3.14 (0.93 - 4.49)             | 2.35 (0.96 - 5.45) | 0.87                               |
| <b>OAT3</b>    | 0.052 (0-0.40)                  | 0.071 (0.00039-0.44)        | 0.21                               | 13.91 (4.54-27.23)             | 15.17 (3.43-37.92) | 0.6                                |
| <b>OCT2</b>    | 0.087 (3.37E-5 - 0.57)          | 0.094 (0.00061-0.50)        | 0.54                               | 27.82 (8.48-45.94)             | 26.62 (6.66-45.44) | 0.78                               |
| <b>PXR</b>     | 4.84E-5 (1.51E-5 - 0.00018)     | 4.34E-5 (4.58E-6 - 0.00029) | 0.64                               | NA                             | NA                 | NA                                 |
