# Supplementary material
Source: PubMed Central journal article supplement (PMC6851658)
Supplement: CPT-106-1083-s003.pdf [file CPT-106-1083-s003.pdf]

**Table S2:** Kruskal Wallis followed by multiple comparisons to examine the differences in mRNA expression between African American and Caucasians in different age groups. All p-values > 0.9999, suggesting no statistical differences in the mRNA expression between these two ethnic groups in all age groups.

|                | <b>Preterm to term newborn*</b> | <b>Infant*</b> | <b>Children*</b> | <b>Adolescent*</b> | <b>Adults*</b> |
|----------------|---------------------------------|----------------|------------------|--------------------|----------------|
| <b>BCRP</b>    | -6.7                            | 5.68           | 11.32            | 26.00              | -29.40         |
| <b>MATE1</b>   | 16.07                           | 35.92          | 11.98            | 1.00               | 23.20          |
| <b>MATE2-K</b> | -76.09                          | 20.14          | 3.00             | -36.70             | 20.40          |
| <b>MDR1</b>    | 5.08                            | 17.25          | -30.64           | -38.4              | 62.60          |
| <b>URAT1</b>   | 20.4                            | -0.87          | 27.52            | 9.30               | 22.80          |
| <b>GLUT2</b>   | 51.17                           | 11.15          | -20.51           | 14.00              | 2.60           |
| <b>OAT1</b>    | 61.50                           | -1.39          | 23.31            | 22.58              | 23.00          |
| <b>OAT3</b>    | -34.70                          | 19.54          | -6.32            | 16.60              | 18.00          |
| <b>OCT2</b>    | -27.98                          | 14.69          | 1.44             | -16.28             | 24.60          |

\* mean rank differences
