# Supplementary material
Source: PubMed Central journal article supplement (PMC6851658)
Supplement: CPT-106-1083-s004.pdf [file CPT-106-1083-s004.pdf]

**Table S3:** Mann-Whitney U test to examine the differences in protein expression levels between African American adults and Caucasian adults

|                | Median (range)      |                      | Mann-Whitney U test p-value |
|----------------|---------------------|----------------------|-----------------------------|
|                | African American    | Caucasian            |                             |
| <b>BCRP</b>    | 0.49 (0.33-0.63)    | 0.46 (0.38-0.5)      | 0.60                        |
| <b>MATE1</b>   | 16.8 (13.47-20.08)  | 23.01 (17.83-44.01)  | 0.095                       |
| <b>MATE2-K</b> | 0.28 (0.14-0.49)    | 0.23 (0.19-0.27)     | 0.14                        |
| <b>MDR1</b>    | 64.57 (49.76-86.57) | 70.98 (61.82-117.00) | 0.55                        |
| <b>URAT1</b>   | 31.72 (24.79-45.64) | 44.2 (12.95-71.51)   | 0.55                        |
| <b>GLUT2</b>   | 36.47 (22.02-42.34) | 48.5 (22.37=66.12)   | 0.31                        |
| <b>OAT1</b>    | 4.49 (1.5-5.45)     | 3.95 (2.46-5.9)      | 0.84                        |
| <b>OAT3</b>    | 19.84 (5.39-27.23)  | 27.75 (14.43-31.51)  | 0.22                        |
| <b>OCT2</b>    | 28.6 (13.76)        | 33.52 (15.47-69.08)  | 0.69                        |
