# Supplementary material
Source: PubMed Central journal article supplement (PMC6851658)
Supplement: CPT-106-1083-s006.pdf [file CPT-106-1083-s006.pdf]

**Table S5:** Absolute abundance of nine selected renal membrane transporters<sup>†</sup>

|                                 | Apical    |             |            |              |             | Basolateral |           |             |             |
|---------------------------------|-----------|-------------|------------|--------------|-------------|-------------|-----------|-------------|-------------|
|                                 | BCRP      | MATE1       | MATE2-K    | MDR1         | URAT1       | GLUT2       | OAT1      | OAT3        | OCT2        |
| <b>All samples</b>              |           |             |            |              |             |             |           |             |             |
| median <sup>^</sup>             | 0.40      | 17.31       | 0.24       | 60.51        | 37.84       | 30.02       | 2.65      | 14.86       | 27.14       |
| Range                           | 0.15-0.63 | 5.72-44.01  | 0-0.81     | 7.84-117.00  | 2.17-76.05  | 6.41-73.34  | 0.93-5.90 | 3.43-37.92  | 6.66-69.08  |
| <b>Term newborn and infants</b> |           |             |            |              |             |             |           |             |             |
| median <sup>^</sup>             | 0.38      | 16.35       | 0.24       | 51.79        | 24.35       | 30.97       | 1.98      | 11.92       | 22.48       |
| Range                           | 0.15-0.59 | 5.72-29.13  | 0.10-0.81  | 7.84-112.4   | 2.17-63.98  | 6.41-73.34  | 0.93-4.25 | 3.43-21.76  | 6.66-45.94  |
| <b>Children</b>                 |           |             |            |              |             |             |           |             |             |
| median <sup>^</sup>             | 0.41      | 18.00       | 0.20       | 73.01        | 47.09       | 24.74       | 3.55      | 19.96       | 35.32       |
| Range                           | 0.16-0.50 | 6.59-31.72  | 0.090-0.43 | 11.68-102.00 | 5.86-76.05  | 7.76-62.25  | 1.14-4.17 | 13.71-31.53 | 8.48-45.44  |
| <b>Adolescents</b>              |           |             |            |              |             |             |           |             |             |
| median <sup>^</sup>             | 0.31      | 14.36       | 0.27       | 78.91        | 34.33       | 26.27       | 3.08      | 24.61       | 28.09       |
| Range                           | 0.29-0.62 | 6.56-26.05  | 0.00-0.41  | 17.03-90.75  | 5.48-49.34  | 8.38-49.50  | 1.83-4.07 | 11.21-37.92 | 12.15-39.61 |
| <b>Adults*</b>                  |           |             |            |              |             |             |           |             |             |
| median <sup>^</sup>             | 0.48      | 19.56       | 0.26       | 69.92        | 42.42       | 38.81       | 4.39      | 26.71       | 29.59       |
| Range                           | 0.33-0.63 | 13.47-44.01 | 0.14-0.49  | 49.76-117.00 | 12.95-71.51 | 22.02-66.12 | 1.50-5.90 | 5.39-31.51  | 13.76-69.08 |

<sup>†</sup>Term newborn and infants were combined for analysis because there was only one term newborn included in this part of the study. Levels of significance are shown in Figure 3.

<sup>^</sup>pmol/mg total membrane protein

\*African American and Caucasian adults
