# Supplementary material
Source: PubMed Central journal article supplement (PMC6851658)
Supplement: CPT-106-1083-s007.pdf [file CPT-106-1083-s007.pdf]

**Table S6:** Primer sequences sample set 1

| <b>Transporter</b> | <b>Sequence</b>                                                           |
|--------------------|---------------------------------------------------------------------------|
| <i>MDR1</i>        | Forward: 5'TTGCCACCACGATAGC 3'<br>Reverse: 5'GCCAAGGGGTCGTAGA 3'          |
| <i>MRP2</i>        | Forward: 5'TGGGACCAAAAAGATGTT 3'<br>Reverse: 5'CCAGGGATTTGTAGCAGTT 3'     |
| <i>MRP4</i>        | Forward: 5' CGGTTTGGTCTCAACAAT 3'<br>Reverse: 5'CCTCCTCCATTTACAGTGAC 3'   |
| <i>MATE1</i>       | Forward: 5'CCTGCAACCTTTCTTTATATG 3'<br>Reverse: 5'CGAGGGCATTGACAAG 3'     |
| <i>MATE2-K</i>     | Forward: 5'GCCCAGGCTGTCATCT 3'<br>Reverse: 5'CTTGGCCTGCACAGTATC 3'        |
| <i>PXR</i>         | Forward: 5'TCTCCCATTTCAAGAATTC 3'<br>Reverse: 5'ATGCCTTTGAACATGTAGGT 3'   |
| <i>OAT1</i>        | Forward: 5'GCCGGAAGGTACTIONCATCT 3'<br>Reverse: 5'ATCCACTCCACATTCAGTGT 3' |
| <i>OAT3</i>        | Forward: 5'CGTGCTTGGAGACCTGT 3'<br>Reverse: 5'GGTCCGTGAGGCTGTAG 3'        |
| <i>OCT2</i>        | Forward: 5'ATCATTAAGCACATCGCAA 3'<br>Reverse: 5'AGCTCGTGAACCAGTTGTAC 3'   |
