# Supplementary material
Source: PubMed Central journal article supplement (PMC6851658)
Supplement: CPT-106-1083-s008.pdf [file CPT-106-1083-s008.pdf]

**Table S7:** Surrogate peptides for each of the renal membrane transporters studied and their corresponding MS/MS parameters

| Transporter | Surrogate peptide  | Precursor Ion | Product Ion | Fragmentor | Collision Energy | Cell Accelerator Voltage | Polarity |
|-------------|--------------------|---------------|-------------|------------|------------------|--------------------------|----------|
| OCT2        | VSLQLLR.light      | 414.7687      | 729.4618    | 380        | 6                | 5                        | Positive |
| OCT2        | VSLQLLR.light      | 414.7687      | 642.4297    | 380        | 10               | 5                        | Positive |
| OCT2        | VSLQLLR.light      | 414.7687      | 529.3457    | 380        | 10               | 5                        | Positive |
| OCT2        | VSLQLLR.light      | 414.7687      | 401.2871    | 380        | 10               | 5                        | Positive |
| OCT2        | VSLQLLR.light      | 414.7687      | 321.7185    | 380        | 8                | 5                        | Positive |
| OCT2        | LNPSFLDLVR.light   | 587.335       | 946.5356    | 380        | 12               | 5                        | Positive |
| OCT2        | LNPSFLDLVR.light   | 587.335       | 849.4829    | 380        | 24               | 5                        | Positive |
| OCT2        | LNPSFLDLVR.light   | 587.335       | 762.4509    | 380        | 24               | 5                        | Positive |
| OCT2        | LNPSFLDLVR.light   | 587.335       | 530.7929    | 380        | 12               | 5                        | Positive |
| OCT2        | LNPSFLDLVR.light   | 587.335       | 473.7715    | 380        | 8                | 5                        | Positive |
| OCT2        | LNPSFLDLVR.light   | 587.335       | 228.1343    | 380        | 8                | 5                        | Positive |
| OCT2        | LNPSFLDLVR.light   | 391.8924      | 559.2875    | 380        | 1                | 5                        | Positive |
| OCT2        | LNPSFLDLVR.light   | 391.8924      | 502.2984    | 380        | 1                | 5                        | Positive |
| OCT2        | LNPSFLDLVR.light   | 391.8924      | 473.7715    | 380        | 1                | 5                        | Positive |
| OCT2        | LNPSFLDLVR.light   | 391.8924      | 387.2714    | 380        | 5                | 5                        | Positive |
| OCT2        | LNPSFLDLVR.light   | 391.8924      | 336.6894    | 380        | 1                | 5                        | Positive |
| OCT2        | SPGVAELSLR.light   | 514.7904      | 844.4887    | 380        | 18               | 5                        | Positive |
| OCT2        | SPGVAELSLR.light   | 514.7904      | 688.3988    | 380        | 14               | 5                        | Positive |
| OCT2        | SPGVAELSLR.light   | 514.7904      | 471.2744    | 380        | 18               | 5                        | Positive |
| OCT2        | SPGVAELSLR.light   | 514.7904      | 341.1819    | 380        | 14               | 5                        | Positive |
| OCT2        | SPGVAELSLR.light   | 514.7904      | 242.1135    | 380        | 18               | 5                        | Positive |
| OCT2        | SPGVAELSLR.light   | 343.5293      | 541.2617    | 380        | 4                | 5                        | Positive |
| OCT2        | SPGVAELSLR.light   | 343.5293      | 488.3191    | 380        | 4                | 5                        | Positive |
| OCT2        | SPGVAELSLR.light   | 343.5293      | 412.2191    | 380        | 8                | 5                        | Positive |
| OCT2        | SPGVAELSLR.light   | 343.5293      | 375.235     | 380        | 8                | 5                        | Positive |
| OCT2        | SPGVAELSLR.light   | 343.5293      | 309.1845    | 380        | 8                | 5                        | Positive |
| OCT2        | KLNPSFLDLVR.light  | 434.5907      | 687.3824    | 380        | 3                | 5                        | Positive |
| OCT2        | KLNPSFLDLVR.light  | 434.5907      | 615.3824    | 380        | 3                | 5                        | Positive |
| OCT2        | KLNPSFLDLVR.light  | 434.5907      | 502.2984    | 380        | 3                | 5                        | Positive |
| OCT2        | KLNPSFLDLVR.light  | 434.5907      | 400.7369    | 380        | 3                | 5                        | Positive |
| OCT2        | KLNPSFLDLVR.light  | 434.5907      | 308.1949    | 380        | 3                | 5                        | Positive |
| OCT2        | VVAGVADAL.light    | 407.7371      | 683.3723    | 380        | 2                | 5                        | Positive |
| OCT2        | VVAGVADAL.light    | 407.7371      | 612.3352    | 380        | 2                | 5                        | Positive |
| OCT2        | VVAGVADAL.light    | 407.7371      | 426.2711    | 380        | 2                | 5                        | Positive |
| OCT2        | VVAGVADAL.light    | 407.7371      | 389.2031    | 380        | 2                | 5                        | Positive |
| OCT2        | VVAGVADAL.light    | 407.7371      | 342.1898    | 380        | 2                | 5                        | Positive |
| OCT2        | VVAGVADAL.light    | 407.7371      | 203.139     | 380        | 2                | 5                        | Positive |
| OAT1        | IYLTLLR.light      | 446.2867      | 778.4822    | 380        | 11               | 5                        | Positive |
| OAT1        | IYLTLLR.light      | 446.2867      | 615.4188    | 380        | 11               | 5                        | Positive |
| OAT1        | IYLTLLR.light      | 446.2867      | 502.3348    | 380        | 7                | 5                        | Positive |
| OAT1        | IYLTLLR.light      | 446.2867      | 390.2387    | 380        | 7                | 5                        | Positive |
| OAT1        | IYLTLLR.light      | 446.2867      | 277.1547    | 380        | 7                | 5                        | Positive |
| OAT1        | LVGFLVINSLGR.light | 644.3928      | 1075.626    | 380        | 18               | 5                        | Positive |
| OAT1        | LVGFLVINSLGR.light | 644.3928      | 871.536     | 380        | 22               | 5                        | Positive |
| OAT1        | LVGFLVINSLGR.light | 644.3928      | 758.4519    | 380        | 14               | 5                        | Positive |
| OAT1        | LVGFLVINSLGR.light | 644.3928      | 659.3835    | 380        | 18               | 5                        | Positive |
| OAT1        | LVGFLVINSLGR.light | 644.3928      | 417.2496    | 380        | 10               | 5                        | Positive |
| OAT1        | LVGFLVINSLGR.light | 644.3928      | 213.1598    | 380        | 22               | 5                        | Positive |
| OAT1        | NGGLEWVLPRL.light  | 570.8116      | 799.4461    | 380        | 20               | 5                        | Positive |
| OAT1        | NGGLEWVLPRL.light  | 570.8116      | 670.4035    | 380        | 8                | 5                        | Positive |
| OAT1        | NGGLEWVLPRL.light  | 570.8116      | 385.2558    | 380        | 12               | 5                        | Positive |

|       |                      |          |          |     |    |   |          |
|-------|----------------------|----------|----------|-----|----|---|----------|
| OAT1  | NGGLEVWLPR.light     | 570.8116 | 342.1772 | 380 | 8  | 5 | Positive |
| OAT1  | NGGLEVWLPR.light     | 570.8116 | 272.1717 | 380 | 12 | 5 | Positive |
| OAT1  | NGGLEVWLPR.light     | 570.8116 | 229.0931 | 380 | 24 | 5 | Positive |
| OAT1  | GQASAMELLR.light     | 538.2819 | 890.4764 | 380 | 11 | 5 | Positive |
| OAT1  | GQASAMELLR.light     | 538.2819 | 819.4393 | 380 | 15 | 5 | Positive |
| OAT1  | GQASAMELLR.light     | 538.2819 | 732.4073 | 380 | 11 | 5 | Positive |
| OAT1  | GQASAMELLR.light     | 538.2819 | 661.3702 | 380 | 11 | 5 | Positive |
| OAT1  | GQASAMELLR.light     | 538.2819 | 257.1244 | 380 | 11 | 5 | Positive |
| OAT1  | TSLAVLGK.light       | 394.7475 | 600.4079 | 380 | 9  | 5 | Positive |
| OAT1  | TSLAVLGK.light       | 394.7475 | 487.3239 | 380 | 9  | 5 | Positive |
| OAT1  | TSLAVLGK.light       | 394.7475 | 416.2867 | 380 | 13 | 5 | Positive |
| OAT1  | TSLAVLGK.light       | 394.7475 | 317.2183 | 380 | 13 | 5 | Positive |
| OAT1  | TSLAVLGK.light       | 394.7475 | 204.1343 | 380 | 17 | 5 | Positive |
| OAT3  | TFSEILNR.light       | 490.264  | 731.4046 | 380 | 13 | 5 | Positive |
| OAT3  | TFSEILNR.light       | 490.264  | 644.3726 | 380 | 13 | 5 | Positive |
| OAT3  | TFSEILNR.light       | 490.264  | 515.33   | 380 | 13 | 5 | Positive |
| OAT3  | TFSEILNR.light       | 490.264  | 402.2459 | 380 | 13 | 5 | Positive |
| OAT3  | TFSEILNR.light       | 490.264  | 289.1619 | 380 | 13 | 5 | Positive |
| OAT3  | TFSEILNR.light       | 490.264  | 249.1234 | 380 | 9  | 5 | Positive |
| OAT3  | INLQKEI.light        | 429.2582 | 744.425  | 380 | 7  | 5 | Positive |
| OAT3  | INLQKEI.light        | 429.2582 | 726.4145 | 380 | 11 | 5 | Positive |
| OAT3  | INLQKEI.light        | 429.2582 | 630.3821 | 380 | 11 | 5 | Positive |
| OAT3  | INLQKEI.light        | 429.2582 | 517.298  | 380 | 7  | 5 | Positive |
| OAT3  | INLQKEI.light        | 429.2582 | 228.1343 | 380 | 7  | 5 | Positive |
| OAT3  | VAVLDGK.light        | 351.2132 | 602.3508 | 380 | 8  | 5 | Positive |
| OAT3  | VAVLDGK.light        | 351.2132 | 531.3137 | 380 | 8  | 5 | Positive |
| OAT3  | VAVLDGK.light        | 351.2132 | 432.2453 | 380 | 8  | 5 | Positive |
| OAT3  | VAVLDGK.light        | 351.2132 | 319.1612 | 380 | 16 | 5 | Positive |
| OAT3  | VAVLDGK.light        | 351.2132 | 204.1343 | 380 | 16 | 5 | Positive |
| OAT3  | YTASDLFR.light       | 486.7429 | 809.4152 | 380 | 13 | 5 | Positive |
| OAT3  | YTASDLFR.light       | 486.7429 | 708.3675 | 380 | 9  | 5 | Positive |
| OAT3  | YTASDLFR.light       | 486.7429 | 637.3304 | 380 | 13 | 5 | Positive |
| OAT3  | YTASDLFR.light       | 486.7429 | 435.2714 | 380 | 21 | 5 | Positive |
| OAT3  | YTASDLFR.light       | 486.7429 | 265.1183 | 380 | 5  | 5 | Positive |
| OAT3  | TVLAVFGK.light       | 417.7578 | 634.3923 | 380 | 6  | 5 | Positive |
| OAT3  | TVLAVFGK.light       | 417.7578 | 521.3082 | 380 | 10 | 5 | Positive |
| OAT3  | TVLAVFGK.light       | 417.7578 | 450.2711 | 380 | 14 | 5 | Positive |
| OAT3  | TVLAVFGK.light       | 417.7578 | 351.2027 | 380 | 18 | 5 | Positive |
| OAT3  | TVLAVFGK.light       | 417.7578 | 201.1234 | 380 | 6  | 5 | Positive |
| MATE1 | QEEPLPEHPQDGAK.light | 525.5864 | 659.3253 | 380 | 10 | 5 | Positive |
| MATE1 | QEEPLPEHPQDGAK.light | 525.5864 | 594.804  | 380 | 10 | 5 | Positive |
| MATE1 | QEEPLPEHPQDGAK.light | 525.5864 | 546.2776 | 380 | 10 | 5 | Positive |
| MATE1 | QEEPLPEHPQDGAK.light | 525.5864 | 489.7356 | 380 | 6  | 5 | Positive |
| MATE1 | QEEPLPEHPQDGAK.light | 525.5864 | 439.886  | 380 | 6  | 5 | Positive |
| MATE1 | QEEPLPEHPQDGAK.light | 525.5864 | 396.8718 | 380 | 10 | 5 | Positive |
| MATE1 | TGEPQSDQQMR.light    | 638.783  | 989.4469 | 380 | 18 | 5 | Positive |
| MATE1 | TGEPQSDQQMR.light    | 638.783  | 559.7484 | 380 | 10 | 5 | Positive |
| MATE1 | TGEPQSDQQMR.light    | 638.783  | 495.2271 | 380 | 18 | 5 | Positive |
| MATE1 | TGEPQSDQQMR.light    | 638.783  | 486.2069 | 380 | 22 | 5 | Positive |
| MATE1 | TGEPQSDQQMR.light    | 638.783  | 288.119  | 380 | 18 | 5 | Positive |
| MATE1 | VGNALGAGDMEQAR.light | 694.833  | 1047.489 | 380 | 20 | 5 | Positive |
| MATE1 | VGNALGAGDMEQAR.light | 694.833  | 934.4047 | 380 | 20 | 5 | Positive |
| MATE1 | VGNALGAGDMEQAR.light | 694.833  | 806.3461 | 380 | 20 | 5 | Positive |
| MATE1 | VGNALGAGDMEQAR.light | 694.833  | 455.2613 | 380 | 16 | 5 | Positive |
| MATE1 | VGNALGAGDMEQAR.light | 694.833  | 342.1772 | 380 | 24 | 5 | Positive |
| MATE1 | VGNALGAGDMEQAR.light | 463.5577 | 467.706  | 380 | 4  | 5 | Positive |
| MATE1 | VGNALGAGDMEQAR.light | 463.5577 | 455.2613 | 380 | 4  | 5 | Positive |

|         |                              |          |          |     |    |   |          |
|---------|------------------------------|----------|----------|-----|----|---|----------|
| MATE1   | VGNALGAGDMEQAR.light         | 463.5577 | 439.1953 | 380 | 4  | 5 | Positive |
| MATE1   | VGNALGAGDMEQAR.light         | 463.5577 | 411.5278 | 380 | 4  | 5 | Positive |
| MATE1   | VGNALGAGDMEQAR.light         | 463.5577 | 374.2146 | 380 | 4  | 5 | Positive |
| MATE1   | VGNALGAGDMEQAR.light         | 463.5577 | 246.1561 | 380 | 4  | 5 | Positive |
| MATE1   | GGPEATLEVR.light             | 514.7722 | 688.3988 | 380 | 14 | 5 | Positive |
| MATE1   | GGPEATLEVR.light             | 514.7722 | 617.3617 | 380 | 18 | 5 | Positive |
| MATE1   | GGPEATLEVR.light             | 514.7722 | 516.314  | 380 | 14 | 5 | Positive |
| MATE1   | GGPEATLEVR.light             | 514.7722 | 457.7507 | 380 | 10 | 5 | Positive |
| MATE1   | GGPEATLEVR.light             | 514.7722 | 412.1827 | 380 | 14 | 5 | Positive |
| MATE1   | MEAPEEPAPVR.light            | 613.2977 | 894.468  | 380 | 21 | 5 | Positive |
| MATE1   | MEAPEEPAPVR.light            | 613.2977 | 539.33   | 380 | 25 | 5 | Positive |
| MATE1   | MEAPEEPAPVR.light            | 613.2977 | 483.2562 | 380 | 13 | 5 | Positive |
| MATE1   | MEAPEEPAPVR.light            | 613.2977 | 447.7376 | 380 | 17 | 5 | Positive |
| MATE1   | MEAPEEPAPVR.light            | 613.2977 | 332.1275 | 380 | 9  | 5 | Positive |
| MATE1   | MEAPEEPAPVR.light            | 613.2977 | 261.0904 | 380 | 17 | 5 | Positive |
| MATE2-K | SFGSPNR.light                | 382.6879 | 530.2681 | 380 | 5  | 5 | Positive |
| MATE2-K | SFGSPNR.light                | 382.6879 | 473.2467 | 380 | 9  | 5 | Positive |
| MATE2-K | SFGSPNR.light                | 382.6879 | 386.2146 | 380 | 9  | 5 | Positive |
| MATE2-K | SFGSPNR.light                | 382.6879 | 379.1612 | 380 | 5  | 5 | Positive |
| MATE2-K | SFGSPNR.light                | 382.6879 | 339.1719 | 380 | 9  | 5 | Positive |
| MATE2-K | SFGSPNR.light                | 382.6879 | 235.1077 | 380 | 5  | 5 | Positive |
| MATE2-K | AEEEAKK.light                | 373.7058 | 675.3672 | 380 | 13 | 5 | Positive |
| MATE2-K | AEEEAKK.light                | 373.7058 | 604.3301 | 380 | 9  | 5 | Positive |
| MATE2-K | AEEEAKK.light                | 373.7058 | 475.2875 | 380 | 9  | 5 | Positive |
| MATE2-K | AEEEAKK.light                | 373.7058 | 338.1872 | 380 | 9  | 5 | Positive |
| MATE2-K | AEEEAKK.light                | 249.4729 | 475.2875 | 380 | 4  | 5 | Positive |
| MATE2-K | AEEEAKK.light                | 249.4729 | 346.2449 | 380 | 4  | 5 | Positive |
| MATE2-K | AEEEAKK.light                | 249.4729 | 338.1872 | 380 | 4  | 5 | Positive |
| MATE2-K | AEEEAKK.light                | 249.4729 | 302.6687 | 380 | 0  | 5 | Positive |
| MATE2-K | AEEEAKK.light                | 249.4729 | 201.087  | 380 | 4  | 5 | Positive |
| MATE2-K | AEEEAKK.light                | 249.4729 | 200.7711 | 380 | 4  | 5 | Positive |
| MATE2-K | FSIAVSR.light                | 390.2241 | 632.3726 | 380 | 13 | 5 | Positive |
| MATE2-K | FSIAVSR.light                | 390.2241 | 545.3406 | 380 | 9  | 5 | Positive |
| MATE2-K | FSIAVSR.light                | 390.2241 | 432.2565 | 380 | 9  | 5 | Positive |
| MATE2-K | FSIAVSR.light                | 390.2241 | 361.2194 | 380 | 9  | 5 | Positive |
| MATE2-K | FSIAVSR.light                | 390.2241 | 235.1077 | 380 | 9  | 5 | Positive |
| MATE2-K | TPEEHALSAPTSR.light          | 489.5793 | 683.3415 | 380 | 13 | 5 | Positive |
| MATE2-K | TPEEHALSAPTSR.light          | 489.5793 | 634.8151 | 380 | 9  | 5 | Positive |
| MATE2-K | TPEEHALSAPTSR.light          | 489.5793 | 618.3206 | 380 | 17 | 5 | Positive |
| MATE2-K | TPEEHALSAPTSR.light          | 489.5793 | 460.2514 | 380 | 13 | 5 | Positive |
| MATE2-K | TPEEHALSAPTSR.light          | 489.5793 | 455.8968 | 380 | 13 | 5 | Positive |
| MATE2-K | VGMALGAADTVQAK.light         | 666.353  | 973.5313 | 380 | 19 | 5 | Positive |
| MATE2-K | VGMALGAADTVQAK.light         | 666.353  | 860.4472 | 380 | 23 | 5 | Positive |
| MATE2-K | VGMALGAADTVQAK.light         | 666.353  | 803.4258 | 380 | 15 | 5 | Positive |
| MATE2-K | VGMALGAADTVQAK.light         | 666.353  | 732.3886 | 380 | 15 | 5 | Positive |
| MATE2-K | VGMALGAADTVQAK.light         | 666.353  | 472.2588 | 380 | 15 | 5 | Positive |
| MATE2-K | VGMALGAADTVQAK.light         | 444.5711 | 616.8188 | 380 | 7  | 5 | Positive |
| MATE2-K | VGMALGAADTVQAK.light         | 444.5711 | 588.3081 | 380 | 7  | 5 | Positive |
| MATE2-K | VGMALGAADTVQAK.light         | 444.5711 | 546.3246 | 380 | 11 | 5 | Positive |
| MATE2-K | VGMALGAADTVQAK.light         | 444.5711 | 392.5411 | 380 | 3  | 5 | Positive |
| MATE2-K | VGMALGAADTVQAK.light         | 444.5711 | 218.1499 | 380 | 11 | 5 | Positive |
| MDR1    | EIIGVVSQEPVLFATTIAENIR.light | 800.4442 | 917.5051 | 380 | 16 | 5 | Positive |
| MDR1    | EIIGVVSQEPVLFATTIAENIR.light | 800.4442 | 816.4574 | 380 | 16 | 5 | Positive |
| MDR1    | EIIGVVSQEPVLFATTIAENIR.light | 800.4442 | 715.4097 | 380 | 24 | 5 | Positive |
| MDR1    | EIIGVVSQEPVLFATTIAENIR.light | 800.4442 | 531.2885 | 380 | 16 | 5 | Positive |
| MDR1    | EIIGVVSQEPVLFATTIAENIR.light | 800.4442 | 512.3079 | 380 | 16 | 5 | Positive |
| MDR1    | EIIGVVSQEPVLFATTIAENIR.light | 800.4442 | 955.5095 | 380 | 16 | 5 | Positive |

|      |                   |          |          |     |    |   |          |
|------|-------------------|----------|----------|-----|----|---|----------|
| MDR1 | AGAVAEVLAIR.light | 635.3617 | 971.552  | 380 | 18 | 5 | Positive |
| MDR1 | AGAVAEVLAIR.light | 635.3617 | 900.5149 | 380 | 18 | 5 | Positive |
| MDR1 | AGAVAEVLAIR.light | 635.3617 | 430.2772 | 380 | 10 | 5 | Positive |
| MDR1 | AGAVAEVLAIR.light | 635.3617 | 359.2401 | 380 | 10 | 5 | Positive |
| MDR1 | AGAVAEVLAIR.light | 635.3617 | 299.1714 | 380 | 18 | 5 | Positive |
| MDR1 | AGAVAEVLAIR.light | 423.9102 | 543.3613 | 380 | 6  | 5 | Positive |
| MDR1 | AGAVAEVLAIR.light | 423.9102 | 430.2772 | 380 | 2  | 5 | Positive |
| MDR1 | AGAVAEVLAIR.light | 423.9102 | 420.7267 | 380 | 2  | 5 | Positive |
| MDR1 | AGAVAEVLAIR.light | 423.9102 | 359.2401 | 380 | 2  | 5 | Positive |
| MDR1 | AGAVAEVLAIR.light | 423.9102 | 272.1843 | 380 | 2  | 5 | Positive |
| MDR1 | IATEAIENFR.light  | 582.3064 | 979.4843 | 380 | 16 | 5 | Positive |
| MDR1 | IATEAIENFR.light  | 582.3064 | 749.3941 | 380 | 16 | 5 | Positive |
| MDR1 | IATEAIENFR.light  | 582.3064 | 678.357  | 380 | 24 | 5 | Positive |
| MDR1 | IATEAIENFR.light  | 582.3064 | 565.2729 | 380 | 24 | 5 | Positive |
| MDR1 | IATEAIENFR.light  | 582.3064 | 490.2458 | 380 | 12 | 5 | Positive |
| MDR1 | IATEAIENFR.light  | 388.54   | 565.2729 | 380 | 1  | 5 | Positive |
| MDR1 | IATEAIENFR.light  | 388.54   | 486.2558 | 380 | 5  | 5 | Positive |
| MDR1 | IATEAIENFR.light  | 388.54   | 436.2303 | 380 | 5  | 5 | Positive |
| MDR1 | IATEAIENFR.light  | 388.54   | 283.1401 | 380 | 1  | 5 | Positive |
| MDR1 | STVVQLLER.light   | 522.806  | 856.5251 | 380 | 10 | 5 | Positive |
| MDR1 | STVVQLLER.light   | 522.806  | 757.4567 | 380 | 18 | 5 | Positive |
| MDR1 | STVVQLLER.light   | 522.806  | 658.3883 | 380 | 14 | 5 | Positive |
| MDR1 | STVVQLLER.light   | 522.806  | 530.3297 | 380 | 18 | 5 | Positive |
| MDR1 | STVVQLLER.light   | 522.806  | 428.7662 | 380 | 10 | 5 | Positive |
| MDR1 | TTIVIAHR.light    | 455.7771 | 708.4515 | 380 | 12 | 5 | Positive |
| MDR1 | TTIVIAHR.light    | 455.7771 | 595.3675 | 380 | 12 | 5 | Positive |
| MDR1 | TTIVIAHR.light    | 455.7771 | 496.299  | 380 | 16 | 5 | Positive |
| MDR1 | TTIVIAHR.light    | 455.7771 | 354.7294 | 380 | 12 | 5 | Positive |
| MDR1 | TTIVIAHR.light    | 455.7771 | 298.1874 | 380 | 12 | 5 | Positive |
| MDR1 | TTIVIAHR.light    | 304.1871 | 496.299  | 380 | 8  | 5 | Positive |
| MDR1 | TTIVIAHR.light    | 304.1871 | 405.2532 | 380 | 4  | 5 | Positive |
| MDR1 | TTIVIAHR.light    | 304.1871 | 354.7294 | 380 | 0  | 5 | Positive |
| MDR1 | TTIVIAHR.light    | 304.1871 | 298.1874 | 380 | 0  | 5 | Positive |
| MDR1 | TTIVIAHR.light    | 304.1871 | 203.1026 | 380 | 0  | 5 | Positive |
| BCRP | SLLDVLAAR.light   | 522.806  | 757.4567 | 380 | 18 | 5 | Positive |
| BCRP | SLLDVLAAR.light   | 522.806  | 644.3726 | 380 | 10 | 5 | Positive |
| BCRP | SLLDVLAAR.light   | 522.806  | 435.774  | 380 | 14 | 5 | Positive |
| BCRP | SLLDVLAAR.light   | 522.806  | 430.2772 | 380 | 14 | 5 | Positive |
| BCRP | SLLDVLAAR.light   | 522.806  | 317.1932 | 380 | 6  | 5 | Positive |
| BCRP | LAEIYVNSFYK.light | 717.3692 | 1007.483 | 380 | 21 | 5 | Positive |
| BCRP | LAEIYVNSFYK.light | 717.3692 | 844.4199 | 380 | 17 | 5 | Positive |
| BCRP | LAEIYVNSFYK.light | 717.3692 | 745.3515 | 380 | 13 | 5 | Positive |
| BCRP | LAEIYVNSFYK.light | 717.3692 | 427.2551 | 380 | 17 | 5 | Positive |
| BCRP | LAEIYVNSFYK.light | 717.3692 | 314.171  | 380 | 21 | 5 | Positive |
| BCRP | LFDSLTLASGR.light | 646.8641 | 1032.568 | 380 | 18 | 5 | Positive |
| BCRP | LFDSLTLASGR.light | 646.8641 | 717.4254 | 380 | 14 | 5 | Positive |
| BCRP | LFDSLTLASGR.light | 646.8641 | 503.2936 | 380 | 14 | 5 | Positive |
| BCRP | LFDSLTLASGR.light | 646.8641 | 390.2096 | 380 | 18 | 5 | Positive |
| BCRP | LFDSLTLASGR.light | 646.8641 | 319.1724 | 380 | 10 | 5 | Positive |
| BCRP | TIIFSIHQPR.light  | 404.568  | 737.4053 | 380 | 10 | 5 | Positive |
| BCRP | TIIFSIHQPR.light  | 404.568  | 499.2825 | 380 | 2  | 5 | Positive |
| BCRP | TIIFSIHQPR.light  | 404.568  | 442.7405 | 380 | 10 | 5 | Positive |
| BCRP | TIIFSIHQPR.light  | 404.568  | 369.2063 | 380 | 10 | 5 | Positive |
| BCRP | TIIFSIHQPR.light  | 404.568  | 215.139  | 380 | 2  | 5 | Positive |
| BCRP | VIQELGLDK.light   | 507.7951 | 802.4305 | 380 | 9  | 5 | Positive |
| BCRP | VIQELGLDK.light   | 507.7951 | 674.3719 | 380 | 9  | 5 | Positive |
| BCRP | VIQELGLDK.light   | 507.7951 | 432.2453 | 380 | 17 | 5 | Positive |

|       |                         |          |          |     |    |   |          |
|-------|-------------------------|----------|----------|-----|----|---|----------|
| BCRP  | VIQELGLDK.light         | 507.7951 | 401.7189 | 380 | 9  | 5 | Positive |
| BCRP  | VIQELGLDK.light         | 507.7951 | 213.1598 | 380 | 9  | 5 | Positive |
| URAT1 | AFSELDDLVGGLGR.light    | 723.9012 | 899.5309 | 380 | 25 | 5 | Positive |
| URAT1 | AFSELDDLVGGLGR.light    | 723.9012 | 786.4468 | 380 | 25 | 5 | Positive |
| URAT1 | AFSELDDLVGGLGR.light    | 723.9012 | 459.2674 | 380 | 21 | 5 | Positive |
| URAT1 | AFSELDDLVGGLGR.light    | 723.9012 | 402.2459 | 380 | 13 | 5 | Positive |
| URAT1 | AFSELDDLVGGLGR.light    | 723.9012 | 232.1404 | 380 | 13 | 5 | Positive |
| URAT1 | AFSELDDLVGGLGR.light    | 482.9366 | 889.4666 | 380 | 5  | 5 | Positive |
| URAT1 | AFSELDDLVGGLGR.light    | 482.9366 | 558.3358 | 380 | 5  | 5 | Positive |
| URAT1 | AFSELDDLVGGLGR.light    | 482.9366 | 459.2674 | 380 | 5  | 5 | Positive |
| URAT1 | AFSELDDLVGGLGR.light    | 482.9366 | 459.2575 | 380 | 5  | 5 | Positive |
| URAT1 | AFSELDDLVGGLGR.light    | 482.9366 | 402.2459 | 380 | 5  | 5 | Positive |
| URAT1 | AFSELDDLVGGLGR.light    | 482.9366 | 279.6715 | 380 | 5  | 5 | Positive |
| URAT1 | GAVQDTLTPEVLLSAMR.light | 600.989  | 836.9506 | 380 | 9  | 5 | Positive |
| URAT1 | GAVQDTLTPEVLLSAMR.light | 600.989  | 787.4163 | 380 | 13 | 5 | Positive |
| URAT1 | GAVQDTLTPEVLLSAMR.light | 600.989  | 786.3992 | 380 | 9  | 5 | Positive |
| URAT1 | GAVQDTLTPEVLLSAMR.light | 600.989  | 723.3871 | 380 | 9  | 5 | Positive |
| URAT1 | GAVQDTLTPEVLLSAMR.light | 600.989  | 558.3028 | 380 | 9  | 5 | Positive |
| URAT1 | MGALLLSHLGR.light       | 640.879  | 908.5676 | 380 | 26 | 5 | Positive |
| URAT1 | MGALLLSHLGR.light       | 640.879  | 795.4835 | 380 | 22 | 5 | Positive |
| URAT1 | MGALLLSHLGR.light       | 640.879  | 682.3995 | 380 | 22 | 5 | Positive |
| URAT1 | MGALLLSHLGR.light       | 640.879  | 569.3154 | 380 | 18 | 5 | Positive |
| URAT1 | MGALLLSHLGR.light       | 640.879  | 260.1063 | 380 | 26 | 5 | Positive |
| URAT1 | GGAILGPLVR.light        | 476.8006 | 654.4297 | 380 | 16 | 5 | Positive |
| URAT1 | GGAILGPLVR.light        | 476.8006 | 541.3457 | 380 | 8  | 5 | Positive |
| URAT1 | GGAILGPLVR.light        | 476.8006 | 484.3242 | 380 | 12 | 5 | Positive |
| URAT1 | GGAILGPLVR.light        | 476.8006 | 412.2554 | 380 | 4  | 5 | Positive |
| URAT1 | GGAILGPLVR.light        | 476.8006 | 299.1714 | 380 | 12 | 5 | Positive |
| URAT1 | GGAILGPLVR.light        | 476.8006 | 271.1765 | 380 | 20 | 5 | Positive |
| URAT1 | GGAILGPLVR.light        | 318.2028 | 484.3242 | 380 | 4  | 5 | Positive |
| URAT1 | GGAILGPLVR.light        | 318.2028 | 387.2714 | 380 | 8  | 5 | Positive |
| URAT1 | GGAILGPLVR.light        | 318.2028 | 274.1874 | 380 | 4  | 5 | Positive |
| URAT1 | GGAILGPLVR.light        | 318.2028 | 271.1765 | 380 | 0  | 5 | Positive |
| URAT1 | GGAILGPLVR.light        | 318.2028 | 242.6657 | 380 | 4  | 5 | Positive |
| GLUT2 | SFEEIAAEFQK.light       | 649.8168 | 1064.526 | 380 | 15 | 5 | Positive |
| GLUT2 | SFEEIAAEFQK.light       | 649.8168 | 693.3566 | 380 | 15 | 5 | Positive |
| GLUT2 | SFEEIAAEFQK.light       | 649.8168 | 622.3195 | 380 | 11 | 5 | Positive |
| GLUT2 | SFEEIAAEFQK.light       | 649.8168 | 235.1077 | 380 | 27 | 5 | Positive |
| GLUT2 | SFEEIAAEFQK.light       | 433.547  | 1211.594 | 380 | 15 | 5 | Positive |
| GLUT2 | SFEEIAAEFQK.light       | 433.547  | 1064.526 | 380 | 15 | 5 | Positive |
| GLUT2 | SFEEIAAEFQK.light       | 433.547  | 622.3195 | 380 | 11 | 5 | Positive |
| GLUT2 | SFEEIAAEFQK.light       | 433.547  | 606.277  | 380 | 3  | 5 | Positive |
| GLUT2 | SFEEIAAEFQK.light       | 433.547  | 551.2824 | 380 | 7  | 5 | Positive |
| GLUT2 | SFEEIAAEFQK.light       | 433.547  | 339.1607 | 380 | 3  | 5 | Positive |
| GLUT2 | VSIIQLFTNSSYR.light     | 764.4119 | 1115.548 | 380 | 19 | 5 | Positive |
| GLUT2 | VSIIQLFTNSSYR.light     | 764.4119 | 987.4894 | 380 | 23 | 5 | Positive |
| GLUT2 | VSIIQLFTNSSYR.light     | 764.4119 | 874.4054 | 380 | 19 | 5 | Positive |
| GLUT2 | VSIIQLFTNSSYR.light     | 764.4119 | 727.3369 | 380 | 15 | 5 | Positive |
| GLUT2 | VSIIQLFTNSSYR.light     | 764.4119 | 413.2758 | 380 | 15 | 5 | Positive |
| GLUT2 | VSIIQLFTNSSYR.light     | 509.9437 | 727.3369 | 380 | 10 | 5 | Positive |
| GLUT2 | VSIIQLFTNSSYR.light     | 509.9437 | 654.4185 | 380 | 6  | 5 | Positive |
| GLUT2 | VSIIQLFTNSSYR.light     | 509.9437 | 626.2893 | 380 | 10 | 5 | Positive |
| GLUT2 | VSIIQLFTNSSYR.light     | 509.9437 | 512.2463 | 380 | 14 | 5 | Positive |
| GLUT2 | VSIIQLFTNSSYR.light     | 509.9437 | 437.7063 | 380 | 6  | 5 | Positive |
| GLUT2 | VSIIQLFTNSSYR.light     | 509.9437 | 364.1721 | 380 | 6  | 5 | Positive |
| GLUT2 | HVLGVPLDDR.light        | 374.2085 | 615.3097 | 380 | 5  | 5 | Positive |
| GLUT2 | HVLGVPLDDR.light        | 374.2085 | 506.3085 | 380 | 1  | 5 | Positive |

|       |                    |          |          |     |    |   |          |
|-------|--------------------|----------|----------|-----|----|---|----------|
| GLUT2 | HVLGVPLDDR.light   | 374.2085 | 407.2401 | 380 | 9  | 5 | Positive |
| GLUT2 | HVLGVPLDDR.light   | 374.2085 | 405.1728 | 380 | 9  | 5 | Positive |
| GLUT2 | HVLGVPLDDR.light   | 374.2085 | 308.1585 | 380 | 1  | 5 | Positive |
| GLUT2 | HVLGVPLDDRK.light  | 416.9068 | 533.2678 | 380 | 10 | 5 | Positive |
| GLUT2 | HVLGVPLDDRK.light  | 416.9068 | 506.3085 | 380 | 10 | 5 | Positive |
| GLUT2 | HVLGVPLDDRK.light  | 416.9068 | 416.2398 | 380 | 2  | 5 | Positive |
| GLUT2 | HVLGVPLDDRK.light  | 416.9068 | 407.2401 | 380 | 10 | 5 | Positive |
| GLUT2 | HVLGVPLDDRK.light  | 416.9068 | 372.206  | 380 | 10 | 5 | Positive |
| GLUT2 | HVLGVPLDDRK.light  | 416.9068 | 237.1346 | 380 | 14 | 5 | Positive |
| GLUT2 | LGPSHILIIAGR.light | 416.2592 | 567.3431 | 380 | 10 | 5 | Positive |
| GLUT2 | LGPSHILIIAGR.light | 416.2592 | 538.8324 | 380 | 6  | 5 | Positive |
| GLUT2 | LGPSHILIIAGR.light | 416.2592 | 359.716  | 380 | 6  | 5 | Positive |
| GLUT2 | LGPSHILIIAGR.light | 416.2592 | 359.5573 | 380 | 6  | 5 | Positive |
| GLUT2 | LGPSHILIIAGR.light | 416.2592 | 303.1775 | 380 | 10 | 5 | Positive |
| GLUT2 | LGPSHILIIAGR.light | 416.2592 | 303.1739 | 380 | 10 | 5 | Positive |
